# Supplementary material
Source: PubMed Central journal article supplement (PMC7388734)
Supplement: NIHMS1015167-supplement-1.pdf [file NIHMS1015167-supplement-1.pdf]

# Supplementary Information For: High Throughput Determination of RNA Structures

Eric J. Strobel<sup>1\*</sup>, Angela M Yu<sup>2\*</sup> and Julius B. Lucks<sup>1</sup>

1 - Department of Chemical and Biological Engineering, Northwestern University, 2145 Sheridan Rd., Evanston, IL 60201

2 - Tri-Institutional Program in Computational Biology and Medicine, Cornell University, Ithaca, New York, Weill Cornell Medical College, New York, New York, Memorial Sloan-Kettering Cancer Center, New York, New York, USA

Correspondence to J. B. L.

e-mail: [jblucks@northwestern.edu](mailto:jblucks@northwestern.edu)

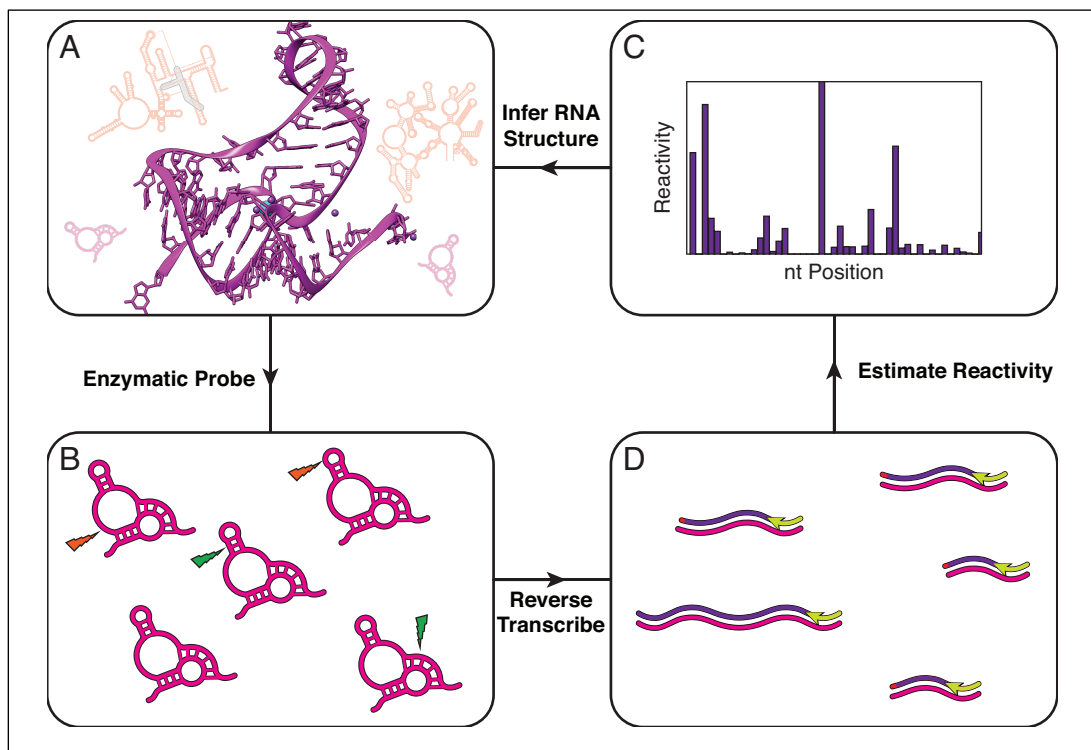

Supplementary Figure 1 | **Determining RNA structures with high throughput sequencing.** A version of Figure 2 illustrating how nuclease digests can be coupled with reverse transcription and high throughput sequencing to map RNA structures<sup>1-5</sup>.

Supplementary Table 1 | **RNA structure modeling approaches that have been used with high throughput RNA structure probing methods.** Specific approaches are listed for each technique included in Table 1.

| Method                                     | Demonstrated Structure Modelling                                                                                                                                                                                                                                                          |
|--------------------------------------------|-------------------------------------------------------------------------------------------------------------------------------------------------------------------------------------------------------------------------------------------------------------------------------------------|
| <b>Enzymatic Probes</b>                    |                                                                                                                                                                                                                                                                                           |
| PARS <sup>1,2</sup> and PARTE <sup>6</sup> | Vienna RNA Package <sup>7</sup><br>SeqFold <sup>8</sup>                                                                                                                                                                                                                                   |
| FragSeq <sup>3</sup>                       | Direct analysis of cutting scores, aggregate analysis of cutting scores over transcriptome                                                                                                                                                                                                |
| dsRNA-seq and ssRNA-seq <sup>4,5</sup>     | Structure score calculation by comparing dsRNA-seq and ssRNA-seq                                                                                                                                                                                                                          |
| <b>Small Molecule Probes</b>               |                                                                                                                                                                                                                                                                                           |
| SHAPE-Seq <sup>9-13</sup>                  | Structural modelling with RNAstructure Package <sup>14-16</sup>                                                                                                                                                                                                                           |
| DMS-seq <sup>17</sup>                      | Direct analysis of reactivities, aggregate analysis over transcriptome                                                                                                                                                                                                                    |
| Mod-seq <sup>18</sup>                      | Direct analysis of reactivities                                                                                                                                                                                                                                                           |
| CIRS-seq <sup>19</sup>                     | Aggregate analysis of reactivities over transcriptome, RNAstructure Package <sup>14,15</sup> , RNA Structure Framework for transcriptome-wide structural modelling <sup>20</sup>                                                                                                          |
| Structure-Seq <sup>21,22,40,41</sup>       | Aggregate analysis of reactivities over transcriptome, RNA structure modelling with RNAstructure Package <sup>14,15</sup> , StructureFold for transcriptome-wide structural modelling <sup>23</sup>                                                                                       |
| ChemModSeq <sup>24,25</sup>                | EM <sup>24,25</sup> or BUM-HMM <sup>26</sup> approach, to classify nucleotides into reactivity bins, analysis of classified data                                                                                                                                                          |
| MAP-Seq <sup>27-29</sup>                   | Direct analysis of reactivities, Reconstruction of RNA secondary structures from mutate-and-map datasets using REEFIT <sup>29</sup>                                                                                                                                                       |
| SHAPE-MaP <sup>30</sup>                    | Differential SHAPE analysis between conditions to identify RNA-ligand/protein interactions <sup>31</sup> ; Structure modelling with RNAstructure Package <sup>14-16</sup> , and comparative sequence alignment <sup>32,33</sup> , Visualization of suboptimal conformations <sup>34</sup> |
| RING-MaP <sup>35</sup>                     | RING analysis to identify tertiary interactions <sup>35</sup> and direct base pair interactions <sup>36</sup> , clustering analysis on sequencing reads to identify sub-populations                                                                                                       |
| icSHAPE <sup>37</sup>                      | Direct analysis of reactivities, aggregate analysis over transcriptome, VTD analysis to uncover differences with in vitro folding                                                                                                                                                         |
| MOHCA-Seq <sup>38</sup>                    | COHCOA framework for identify 2D proximity maps, three dimensional modelling with Rosetta                                                                                                                                                                                                 |
| SHAPES <sup>39</sup>                       | Direct analysis of reactivities                                                                                                                                                                                                                                                           |
| DMS-MaP-Seq <sup>42</sup>                  | Aggregate analysis of reactivities over transcriptome, RNA structure modelling with RNAfold Package <sup>43</sup>                                                                                                                                                                         |
| <b>Ligation-Based Methods</b>              |                                                                                                                                                                                                                                                                                           |
| RNA Proximity Ligation <sup>44</sup>       | Direct analysis of ligation junctions with respect to secondary structure models                                                                                                                                                                                                          |
| LIQR-Seq <sup>45</sup>                     | Detection of ligation junctions and secondary structure models from known models and <i>in silico</i> prediction on ligated products                                                                                                                                                      |
| PARIS <sup>46</sup>                        | Detection of ligated junctions and their consensus structure prediction from RNAalifold                                                                                                                                                                                                   |
| SPLASH <sup>47</sup>                       | Detection of ligated junctions, comparison to known crystal and secondary structures, and compared found ligation products to a snoRNA prediction program (PLEXY)                                                                                                                         |

## Supplementary References

- 1 Kertesz, M. *et al.* Genome-wide measurement of RNA secondary structure in yeast. *Nature* **467**, 103-107, doi:10.1038/nature09322 (2010).
- 2 Wan, Y. *et al.* Landscape and variation of RNA secondary structure across the human transcriptome. *Nature* **505**, 706-709, doi:10.1038/nature12946 (2014).
- 3 Underwood, J. G. *et al.* FragSeq: transcriptome-wide RNA structure probing using high-throughput sequencing. *Nat Methods* **7**, 995-1001, doi:10.1038/nmeth.1529 (2010).
- 4 Zheng, Q. *et al.* Genome-wide double-stranded RNA sequencing reveals the functional significance of base-paired RNAs in Arabidopsis. *PLoS Genet* **6**, e1001141, doi:10.1371/journal.pgen.1001141 (2010).
- 5 Li, F. *et al.* Global analysis of RNA secondary structure in two metazoans. *Cell Rep* **1**, 69-82, doi:10.1016/j.celrep.2011.10.002 (2012).

- 6 Wan, Y. *et al.* Genome-wide measurement of RNA folding energies. *Mol Cell* **48**, 169-181, doi:10.1016/j.molcel.2012.08.008 (2012).
- 7 Washietl, S., Hofacker, I. L., Stadler, P. F. & Kellis, M. RNA folding with soft constraints: reconciliation of probing data and thermodynamic secondary structure prediction. *Nucleic Acids Res* **40**, 4261-4272, doi:10.1093/nar/gks009 (2012).
- 8 Ouyang, Z., Snyder, M. P. & Chang, H. Y. SeqFold: genome-scale reconstruction of RNA secondary structure integrating high-throughput sequencing data. *Genome Res* **23**, 377-387, doi:10.1101/gr.138545.112 (2013).
- 9 Lucks, J. B. *et al.* Multiplexed RNA structure characterization with selective 2'-hydroxyl acylation analyzed by primer extension sequencing (SHAPE-Seq). *Proc Natl Acad Sci U S A* **108**, 11063-11068, doi:10.1073/pnas.1106501108 (2011).
- 10 Loughrey, D., Watters, K. E., Settle, A. H. & Lucks, J. B. SHAPE-Seq 2.0: systematic optimization and extension of high-throughput chemical probing of RNA secondary structure with next generation sequencing. *Nucleic Acids Res* **42**, doi:10.1093/nar/gku909 (2014).
- 11 Watters, K. E., Abbott, T. R. & Lucks, J. B. Simultaneous characterization of cellular RNA structure and function with in-cell SHAPE-Seq. *Nucleic Acids Res* **44**, e12, doi:10.1093/nar/gkv879 (2016).
- 12 Watters, K. E., Strobel, E. J., Yu, A. M., Lis, J. T. & Lucks, J. B. Cotranscriptional folding of a riboswitch at nucleotide resolution. *Nat Struct Mol Biol* **23**, 1124-1131, doi:10.1038/nsmb.3316 (2016).
- 13 Watters, K. E. *et al.* Probing of RNA structures in a positive sense RNA virus reveals selection pressure for structural elements. *Nucleic Acids Res* (2018).
- 14 Reuter, J. S. & Mathews, D. H. RNAstructure: software for RNA secondary structure prediction and analysis. *BMC Bioinformatics* **11**, 129, doi:10.1186/1471-2105-11-129 (2010).
- 15 Deigan, K. E., Li, T. W., Mathews, D. H. & Weeks, K. M. Accurate SHAPE-directed RNA structure determination. *Proc Natl Acad Sci U S A* **106**, 97-102, doi:10.1073/pnas.0806929106 (2009).
- 16 Hajdin, C. E. *et al.* Accurate SHAPE-directed RNA secondary structure modeling, including pseudoknots. *Proc Natl Acad Sci U S A* **110**, 5498-5503, doi:10.1073/pnas.1219988110 (2013).
- 17 Rouskin, S., Zubradt, M., Washietl, S., Kellis, M. & Weissman, J. S. Genome-wide probing of RNA structure reveals active unfolding of mRNA structures in vivo. *Nature* **505**, 701-705, doi:10.1038/nature12894 (2014).
- 18 Talkish, J., May, G., Lin, Y., Woolford, J. L., Jr. & McManus, C. J. Mod-seq: high-throughput sequencing for chemical probing of RNA structure. *RNA* **20**, 713-720, doi:10.1261/rna.042218.113 (2014).
- 19 Incarnato, D., Neri, F., Anselmi, F. & Oliviero, S. Genome-wide profiling of mouse RNA secondary structures reveals key features of the mammalian transcriptome. *Genome Biol* **15**, 491, doi:10.1186/s13059-014-0491-2 (2014).
- 20 Incarnato, D., Neri, F., Anselmi, F. & Oliviero, S. RNA structure framework: automated transcriptome-wide reconstruction of RNA secondary structures from high-throughput structure probing data. *Bioinformatics* **32**, 459-461, doi:10.1093/bioinformatics/btv571 (2016).
- 21 Ding, Y. *et al.* In vivo genome-wide profiling of RNA secondary structure reveals novel regulatory features. *Nature* **505**, 696-700, doi:10.1038/nature12756 (2014).
- 22 Ritchey, L. E. *et al.* Structure-seq2: sensitive and accurate genome-wide profiling of RNA structure in vivo. *Nucleic Acids Res* **45**, e135, doi:10.1093/nar/gkx533 (2017).

- 23 Tang, Y. *et al.* StructureFold: genome-wide RNA secondary structure mapping and reconstruction in vivo. *Bioinformatics* **31**, 2668-2675, doi:10.1093/bioinformatics/btv213 (2015).
- 24 Hector, R. D. *et al.* Snapshots of pre-rRNA structural flexibility reveal eukaryotic 40S assembly dynamics at nucleotide resolution. *Nucleic Acids Res* **42**, 12138-12154, doi:10.1093/nar/gku815 (2014).
- 25 Burlacu, E. *et al.* High-throughput RNA structure probing reveals critical folding events during early 60S ribosome assembly in yeast. *Nat Commun* **8**, 714, doi:10.1038/s41467-017-00761-8 (2017).
- 26 Selega, A., Sirocchi, C., Iosub, I., Granneman, S. & Sanguinetti, G. Robust statistical modeling improves sensitivity of high-throughput RNA structure probing experiments. *Nat Methods* **14**, 83-89, doi:10.1038/nmeth.4068 (2017).
- 27 Kladwang, W. *et al.* Standardization of RNA chemical mapping experiments. *Biochemistry* **53**, 3063-3065, doi:10.1021/bi5003426 (2014).
- 28 Seetin, M. G., Kladwang, W., Bida, J. P. & Das, R. Massively parallel RNA chemical mapping with a reduced bias MAP-seq protocol. *Methods Mol Biol* **1086**, 95-117, doi:10.1007/978-1-62703-667-2\_6 (2014).
- 29 Cordero, P. & Das, R. Rich RNA Structure Landscapes Revealed by Mutate-and-Map Analysis. *PLoS Comput Biol* **11**, e1004473, doi:10.1371/journal.pcbi.1004473 (2015).
- 30 Siegfried, N. A., Busan, S., Rice, G. M., Nelson, J. A. & Weeks, K. M. RNA motif discovery by SHAPE and mutational profiling (SHAPE-MaP). *Nat Methods* **11**, 959-965, doi:10.1038/nmeth.3029 (2014).
- 31 Smola, M. J., Calabrese, J. M. & Weeks, K. M. Detection of RNA-Protein Interactions in Living Cells with SHAPE. *Biochemistry* **54**, 6867-6875, doi:10.1021/acs.biochem.5b00977 (2015).
- 32 Mauger, D. M. *et al.* Functionally conserved architecture of hepatitis C virus RNA genomes. *Proc Natl Acad Sci U S A* **112**, 3692-3697, doi:10.1073/pnas.1416266112 (2015).
- 33 Lavender, C. A., Gorelick, R. J. & Weeks, K. M. Structure-Based Alignment and Consensus Secondary Structures for Three HIV-Related RNA Genomes. *PLoS Comput Biol* **11**, e1004230, doi:10.1371/journal.pcbi.1004230 (2015).
- 34 Woods, C. T. *et al.* Comparative Visualization of the RNA Suboptimal Conformational Ensemble In Vivo. *Biophys J* **113**, 290-301, doi:10.1016/j.bpj.2017.05.031 (2017).
- 35 Homan, P. J. *et al.* Single-molecule correlated chemical probing of RNA. *Proc Natl Acad Sci U S A* **111**, 13858-13863, doi:10.1073/pnas.1407306111 (2014).
- 36 Krokhotin, A., Mustoe, A. M., Weeks, K. M. & Dokholyan, N. V. Direct identification of base-paired RNA nucleotides by correlated chemical probing. *RNA* **23**, 6-13, doi:10.1261/rna.058586.116 (2017).
- 37 Spitale, R. C. *et al.* Structural imprints in vivo decode RNA regulatory mechanisms. *Nature* **519**, 486-490, doi:10.1038/nature14263 (2015).
- 38 Cheng, C. Y. *et al.* Consistent global structures of complex RNA states through multidimensional chemical mapping. *Elife* **4**, e07600, doi:10.7554/eLife.07600 (2015).
- 39 Poulsen, L. D., Kielpinski, L. J., Salama, S. R., Krogh, A. & Vinther, J. SHAPE Selection (SHAPES) enrich for RNA structure signal in SHAPE sequencing-based probing data. *RNA* **21**, 1042-1052, doi:10.1261/rna.047068.114 (2015).
- 40 Fang, R., Moss, W. N., Rutenberg-Schoenberg, M. & Simon, M. D. Probing Xist RNA Structure in Cells Using Targeted Structure-Seq. *PLoS Genet* **11**, e1005668, doi:10.1371/journal.pgen.1005668 (2015).
- 41 Sexton, A. N., Wang, P. Y., Rutenberg-Schoenberg, M. & Simon, M. D. Interpreting Reverse Transcriptase Termination and Mutation Events for Greater Insight into the Chemical Probing of RNA. *Biochemistry* **56**, 4713-4721, doi:10.1021/acs.biochem.7b00323 (2017).

- 42 Zubradt, M. *et al.* DMS-MaPseq for genome-wide or targeted RNA structure probing in vivo. *Nat Methods* **14**, 75-82, doi:10.1038/nmeth.4057 (2017).
- 43 Lorenz, R. *et al.* ViennaRNA Package 2.0. *Algorithms Mol Biol* **6**, 26, doi:10.1186/1748-7188-6-26 (2011).
- 44 Ramani, V., Qiu, R. & Shendure, J. High-throughput determination of RNA structure by proximity ligation. *Nat Biotechnol* **33**, 980-984, doi:10.1038/nbt.3289 (2015).
- 45 Sharma, E., Sterne-Weiler, T., O'Hanlon, D. & Blencowe, B. J. Global Mapping of Human RNA-RNA Interactions. *Mol Cell* **62**, 618-626, doi:10.1016/j.molcel.2016.04.030 (2016).
- 46 Lu, Z. *et al.* RNA Duplex Map in Living Cells Reveals Higher-Order Transcriptome Structure. *Cell* **165**, 1267-1279, doi:10.1016/j.cell.2016.04.028 (2016).
- 47 Aw, J. G. *et al.* In Vivo Mapping of Eukaryotic RNA Interactomes Reveals Principles of Higher-Order Organization and Regulation. *Mol Cell* **62**, 603-617, doi:10.1016/j.molcel.2016.04.028 (2016).
